# Supplementary material for: Photocatalytic nanomaterials and their implications towards biomass conversion for renewable chemical and fuel production
Source: Royal Society of Chemistry journal article supplement (doi:10.1039/d4na00447g), 2024-01-01
Supplement: d4na00447g1.pdf [file d4na00447g1.pdf]

**Supplementary File**

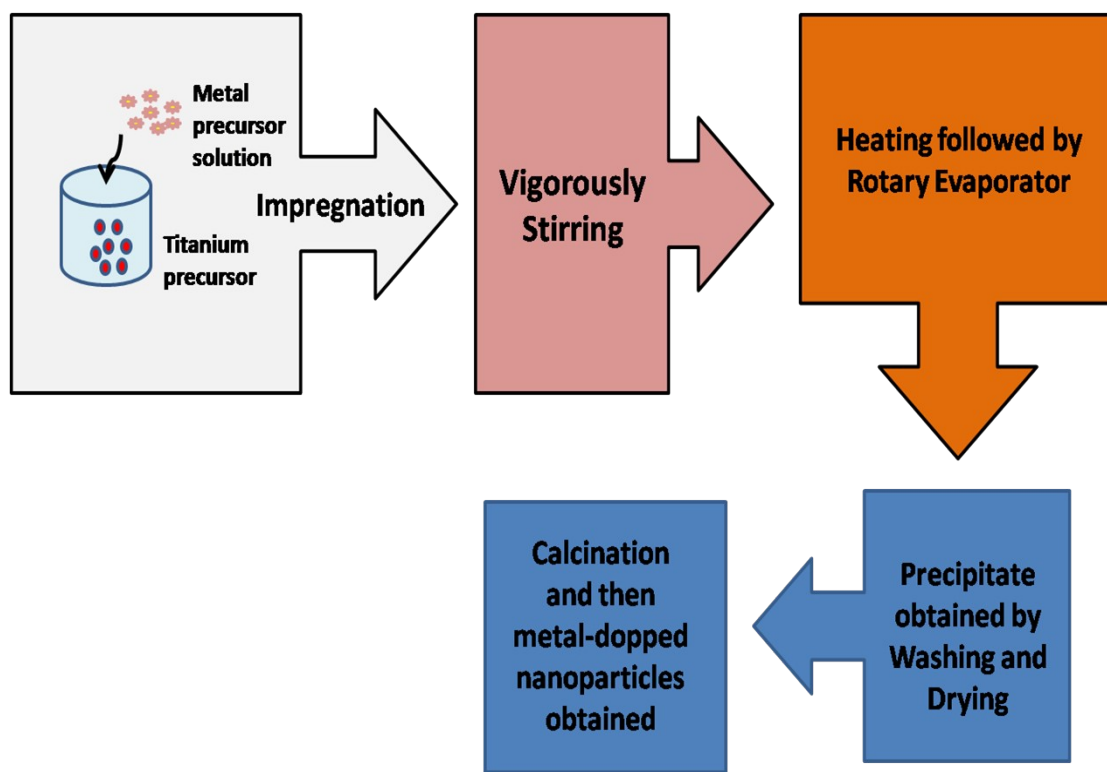

**Fig. S1** Flow chart for metal-doped TiO<sub>2</sub> plasmonic nanoparticles by impregnation method.

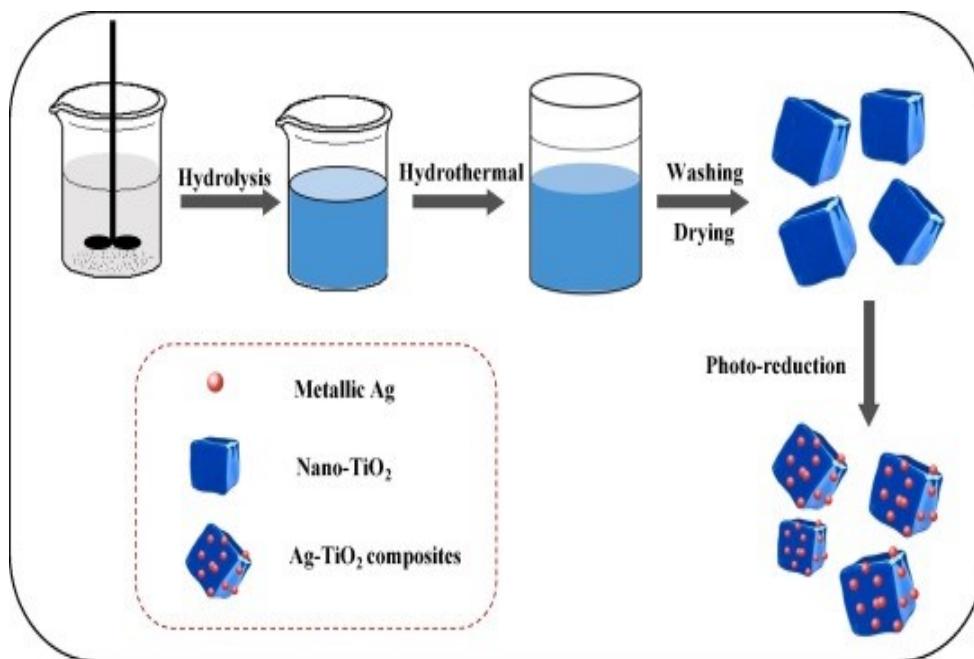

Fig. S2 Ag/TiO<sub>2</sub> nanocomposites preparation by photodeposition method (Zheng et al., 2019).

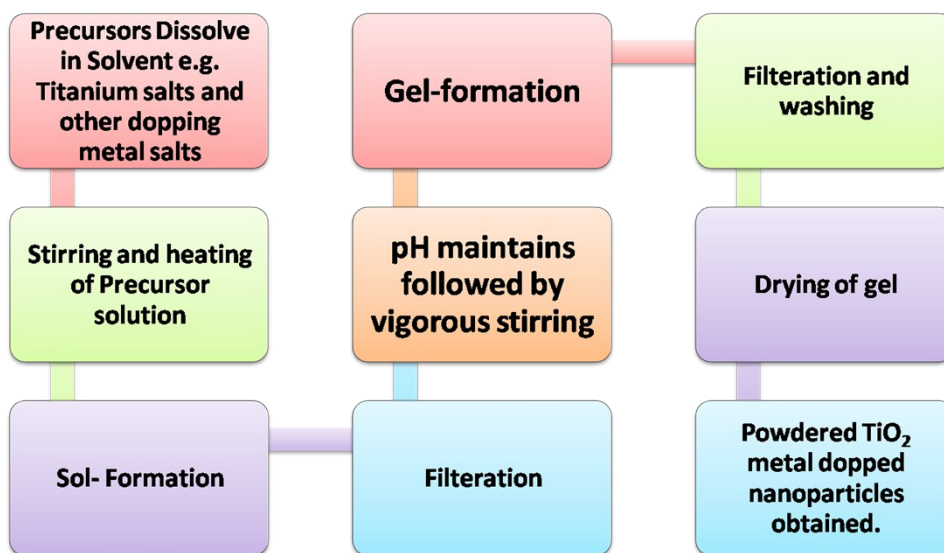

Fig. S3 Sol-Gel method for preparation of metal-doped TiO<sub>2</sub> nanoparticles.

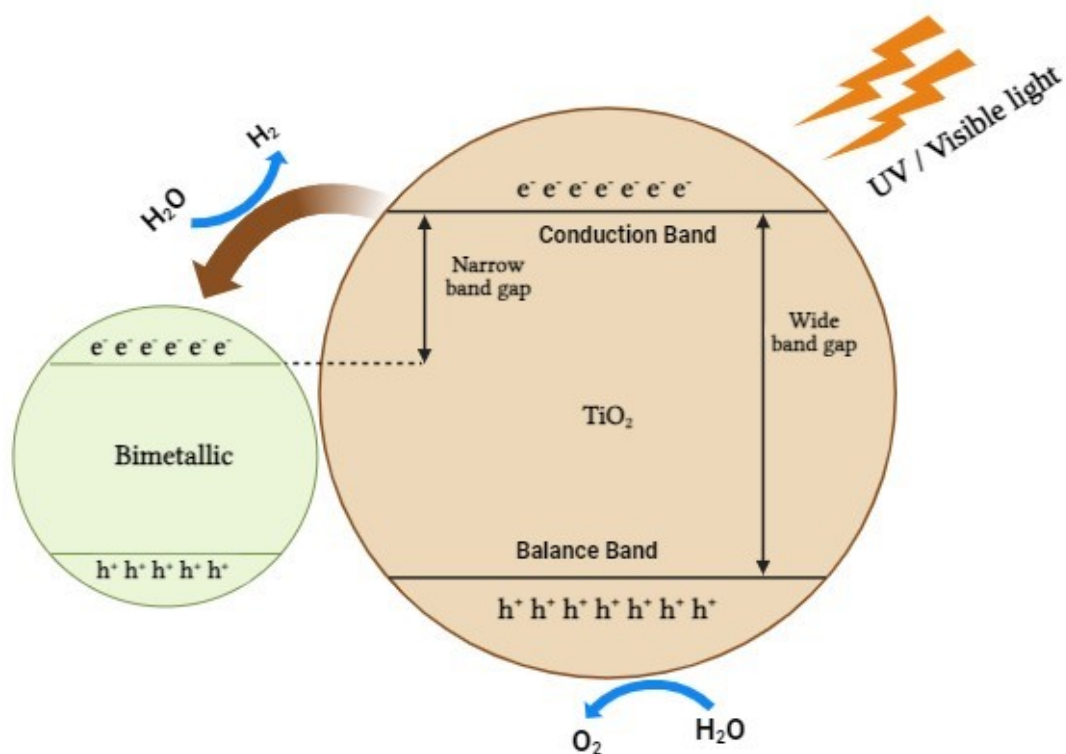

**Fig. S4** Bimetallic doped TiO<sub>2</sub> nanophotocatalysts.

**Table S1:** List of abbreviations associated with the review manuscript

|                            |                  |
|----------------------------|------------------|
| 5- Hydroxymethylfurfural   | HMF              |
| 2,5-Furandicarboxylic acid | FDCA             |
| Reactive Oxygen Species    | ROS              |
| Density Functional Theory  | DFT              |
| Titanium dioxide           | TiO <sub>2</sub> |
| Nanoparticles              | NPs              |
| Cadmium Sulphide           | CdS              |
| Tungsten trioxide          | WO <sub>3</sub>  |
| Hydrogen                   | H <sub>2</sub>   |
| Valence band               | VB               |
| Conduction band            | CB               |
| Activated carbon           | AC               |

|                                     |      |
|-------------------------------------|------|
| Solvated metal atom dispersion      | SMAD |
| Localized surface plasmon resonance | LSPR |
| 2,5-diformylfuran                   | DFF  |
| Carbon molecular sieves             | CMS  |
| Oxygen evolution reaction           | OER  |
| Surface plasmon resonance           | SPR  |
| Nanoclusters                        | NCs  |
| Deionized water                     | DI   |
| Lignocellulosic biomass             | LCB  |
| Benzene, Toluene, Xylene            | BTX  |
| Surface-enhanced Raman spectroscopy | SERS |
| Highest occupied molecular orbital  | HOMO |
| Lowest unoccupied molecular orbital | LUMO |
| Greenhouse gas                      | GHG  |
| Electron Spin Resonance             | ESR  |
